# Supplementary material for: Longitudinal Evaluation of Humoral Immunity and Bacterial and Clinical Parameters Reveals That Antigen-Specific Antibodies Suppress Inflammatory Responses in Active Tuberculosis Patients
Source: Hindawi journal article supplement (doi:10.1155/2018/4928757), 2018-07-04
Supplement: f2 [file 4928757.f2.pdf]

Supplemental table 1. Antibody responses in individuals

| ID | IgG level-before treatment |        |       |        |        |       |       |
|----|----------------------------|--------|-------|--------|--------|-------|-------|
|    | ESAT-6                     | CFP-10 | MDP1  | Ag85A  | Acr    | HBHA  | HrpA  |
| 01 | 0.387                      | 0.854  | 1.286 | 1.137  | 0.379  | 0.615 | 0.220 |
| 02 | 0.109                      | 0.108  | 0.878 | 0.130  | 0.113  | 0.057 | 0.090 |
| 03 | 0.404                      | 0.572  | 1.534 | 0.931  | 0.319  | 0.495 | 0.162 |
| 04 | 0.120                      | 0.385  | 2.368 | 1.260  | 0.376  | 0.176 | 0.115 |
| 05 | 0.203                      | 0.592  | 2.456 | 0.310  | 0.349  | 0.044 | 0.080 |
| 06 | 0.032                      | 0.114  | 0.813 | 0.255  | 0.094  | 0.924 | 0.578 |
| 07 | 0.533                      | 1.359  | 1.522 | 1.309  | 0.499  | 1.249 | 0.924 |
| 08 | 0.095                      | 0.304  | 1.127 | 0.212  | 0.148  | 0.561 | 0.150 |
| 09 | 0.144                      | 0.177  | 1.701 | 0.125  | 0.140  | 0.458 | 0.273 |
| 10 | 0.095                      | 0.190  | 0.806 | 0.178  | 0.113  | 0.311 | 0.315 |
| 11 | 0.052                      | 0.305  | 1.441 | 0.302  | 0.437  | 0.465 | 0.578 |
| 12 | 0.029                      | 0.156  | 1.336 | 0.167  | 0.002  | 0.322 | 0.320 |
| 13 | 0.261                      | 0.654  | 2.119 | 1.030  | 0.418  | 1.481 | 0.635 |
| 14 | 0.175                      | 0.288  | 1.192 | 0.206  | 0.053  | 0.259 | 0.332 |
| 15 | 0.182                      | 0.624  | 1.416 | 0.465  | 0.251  | 1.069 | 0.962 |
| 16 | 0.101                      | 0.386  | 1.412 | 0.205  | 1.079  | 0.578 | 0.745 |
| 17 | 0.239                      | 0.350  | 2.205 | 2.133  | 0.408  | 0.342 | 0.123 |
| 18 | 0.010                      | 0.625  | 1.644 | 0.265  | 0.216  | 0.308 | 0.136 |
| 19 | 0.045                      | 0.616  | 1.105 | 0.260  | 0.123  | 0.635 | 0.234 |
| 20 | 0.023                      | 0.358  | 1.394 | 0.069  | 0.251  | 0.331 | 0.647 |
| 21 | 0.036                      | 1.775  | 0.985 | 0.225  | 0.208  | 0.291 | 0.238 |
| 22 | 0.039                      | 0.447  | 0.584 | 0.150  | 0.065  | 0.197 | 0.180 |
| 23 | 0.186                      | 1.571  | 1.350 | 0.943  | 0.633  | 1.271 | 1.150 |
| 24 | 0.045                      | 0.337  | 0.404 | 0.029  | 0.030  | 0.325 | 0.131 |
| 25 | 0.053                      | 0.481  | 0.851 | 0.087  | 0.071  | 0.471 | 0.193 |
| 26 | 1.243                      | 2.838  | 2.745 | 2.301  | 2.502  | 1.812 | 1.488 |
| 27 | 0.059                      | 0.819  | 1.539 | 0.188  | 0.157  | 0.253 | 0.370 |
| 28 | 0.068                      | 1.213  | 1.729 | 0.173  | 0.212  | 0.149 | 0.110 |
| 29 | 0.088                      | 0.162  | 0.150 | -0.004 | -0.001 | 0.449 | 0.568 |
| 30 | 0.127                      | 0.350  | 0.059 | 0.047  | 0.045  | 0.836 | 0.152 |
| 31 | 0.201                      | 0.701  | 1.479 | 0.252  | 0.243  | 0.512 | 0.409 |
| 32 | 0.043                      | 1.323  | 0.548 | 0.005  | 0.029  | 0.121 | 0.123 |
| 33 | 0.159                      | 1.179  | 1.398 | 0.302  | 0.178  | 0.134 | 0.199 |

Supplemental table 1. continued

| ID | IgG level-after treatment |        |       |       |        |       |       |
|----|---------------------------|--------|-------|-------|--------|-------|-------|
|    | ESAT-6                    | CFP-10 | MDP1  | Ag85A | Acr    | HBHA  | HrpA  |
| 01 | 0.240                     | 0.559  | 1.401 | 0.751 | 0.260  | 0.312 | 0.170 |
| 02 | 0.086                     | 0.094  | 0.630 | 0.127 | 0.131  | 0.044 | 0.080 |
| 03 | 0.754                     | 0.536  | 2.152 | 1.288 | 0.636  | 0.638 | 0.085 |
| 04 | 0.099                     | 0.335  | 2.109 | 1.344 | 0.376  | 0.222 | 0.126 |
| 5  | 0.116                     | 0.137  | 2.283 | 0.258 | 0.288  | 0.495 | 0.162 |
| 6  | 0.066                     | 0.131  | 0.955 | 0.184 | 0.129  | 0.552 | 0.464 |
| 7  | 0.410                     | 0.923  | 1.583 | 0.890 | 0.362  | 0.875 | 0.716 |
| 8  | 0.039                     | 0.243  | 0.931 | 0.127 | 0.093  | 0.546 | 0.134 |
| 9  | 0.144                     | 0.126  | 1.434 | 0.202 | 0.132  | 0.335 | 0.217 |
| 10 | -0.002                    | 0.099  | 1.320 | 0.088 | 0.038  | 0.466 | 0.124 |
| 11 | 0.081                     | 0.492  | 1.887 | 0.531 | 0.503  | 0.668 | 0.620 |
| 12 | 0.020                     | 0.253  | 0.948 | 0.298 | -0.009 | 0.207 | 0.461 |
| 13 | 0.234                     | 0.681  | 2.009 | 0.971 | 0.594  | 1.860 | 0.783 |
| 14 | 0.132                     | 0.235  | 0.841 | 0.199 | 0.016  | 0.107 | 0.229 |
| 15 | 0.170                     | 0.338  | 1.050 | 0.296 | 0.201  | 0.892 | 0.706 |
| 16 | 0.105                     | 0.257  | 1.749 | 0.199 | 0.121  | 0.714 | 0.773 |
| 17 | 0.166                     | 0.313  | 2.147 | 1.828 | 0.273  | 0.112 | 0.110 |
| 18 | 0.024                     | 0.684  | 1.710 | 0.246 | 0.206  | 0.350 | 0.148 |
| 19 | 0.058                     | 0.569  | 0.914 | 0.215 | 0.073  | 0.793 | 0.168 |
| 20 | 0.015                     | 0.419  | 1.360 | 0.078 | 0.210  | 0.090 | 0.437 |
| 21 | 0.017                     | 0.840  | 0.691 | 0.120 | 0.020  | 0.176 | 0.129 |
| 22 | 0.031                     | 0.571  | 0.559 | 0.126 | 0.084  | 0.196 | 0.204 |
| 23 | 0.178                     | 1.369  | 1.193 | 0.595 | 0.381  | 0.940 | 0.713 |
| 24 | 0.169                     | 0.326  | 0.537 | 0.030 | 0.009  | 0.750 | 0.148 |
| 25 | 0.069                     | 0.415  | 0.614 | 0.121 | 0.077  | 0.465 | 0.190 |
| 26 | 0.904                     | 2.783  | 2.336 | 1.469 | 1.251  | 1.711 | 1.216 |
| 27 | 0.075                     | 0.876  | 1.735 | 0.206 | 0.127  | 0.331 | 0.423 |
| 28 | 0.022                     | 1.460  | 1.867 | 0.158 | 0.166  | 0.133 | 0.021 |
| 29 | 0.108                     | 0.293  | 0.363 | 0.012 | 0.018  | 0.445 | 0.441 |
| 30 | 0.116                     | 0.419  | 0.627 | 0.211 | 0.064  | 0.814 | 0.204 |
| 31 | 0.146                     | 0.666  | 1.469 | 0.303 | 0.162  | 0.442 | 0.336 |
| 32 | 0.070                     | 1.419  | 1.733 | 0.044 | 0.083  | 0.173 | 0.102 |
| 33 | 0.029                     | 1.083  | 1.347 | 0.341 | 0.244  | 0.140 | 0.240 |

Supplemental table 1. continued

| ID | IgG Avidity level-before treatment |        |       |       |       |       |       |
|----|------------------------------------|--------|-------|-------|-------|-------|-------|
|    | ESAT-6                             | CFP-10 | MDP1  | Ag85A | Acr   | HBHA  | HrpA  |
| 1  | 0.877                              | 0.786  | 0.558 | 0.828 | 0.740 | 0.798 | 0.625 |
| 2  | 0.558                              | 0.623  | 0.379 | 0.664 | 0.341 | 0.219 | 0.335 |
| 3  | 0.711                              | 0.429  | 0.541 | 0.705 | 0.329 | 0.590 | 0.657 |
| 4  | 0.579                              | 0.488  | 0.797 | 0.824 | 0.758 | 0.327 | 0.734 |
| 5  | 0.686                              | 0.160  | 0.664 | 0.680 | 0.638 | 0.253 | 0.981 |
| 6  | 1.031                              | 0.461  | 0.558 | 0.580 | 0.553 | 0.863 | 0.876 |
| 7  | 0.455                              | 0.709  | 0.667 | 0.710 | 0.402 | 0.832 | 0.880 |
| 8  | 0.163                              | 0.877  | 0.391 | 0.686 | 0.568 | 0.766 | 0.455 |
| 9  | 0.632                              | 0.777  | 0.575 | 0.916 | 1.300 | 0.465 | 0.564 |
| 10 | 0.953                              | 0.433  | 0.429 | 0.265 | 0.447 | 0.559 | 0.633 |
| 11 | 0.728                              | 0.548  | 0.353 | 0.504 | 0.223 | 0.805 | 0.448 |
| 12 | 1.448                              | 0.455  | 0.508 | 0.977 | 1.121 | 0.620 | 0.631 |
| 13 | 0.289                              | 0.780  | 0.597 | 0.898 | 0.794 | 0.749 | 0.632 |
| 14 | 0.683                              | 0.439  | 0.557 | 0.331 | 0.676 | 0.294 | 0.246 |
| 15 | 1.505                              | 0.686  | 0.554 | 0.754 | 0.599 | 0.522 | 0.622 |
| 16 | 0.515                              | 0.187  | 0.398 | 0.408 | 0.035 | 0.600 | 0.616 |
| 17 | 0.467                              | 0.635  | 0.689 | 0.440 | 0.598 | 0.466 | 0.755 |
| 18 | 0.200                              | 0.748  | 0.760 | 0.637 | 0.620 | 0.839 | 0.900 |
| 19 | 0.511                              | 0.623  | 0.621 | 0.135 | 0.565 | 0.893 | 0.672 |
| 20 | 0.111                              | 0.916  | 0.685 | 0.783 | 0.637 | 0.805 | 0.349 |
| 21 | 0.319                              | 0.798  | 0.736 | 0.673 | 0.178 | 0.568 | 0.269 |
| 22 | 0.603                              | 0.682  | 0.618 | 0.490 | 0.395 | 0.160 | 0.348 |
| 23 | 0.796                              | 0.886  | 0.622 | 0.965 | 0.379 | 0.782 | 0.816 |
| 24 | 0.967                              | 0.698  | 0.529 | 1.379 | 1.267 | 1.057 | 0.706 |
| 25 | 0.566                              | 0.905  | 0.661 | 1.532 | 0.418 | 0.644 | 0.764 |
| 26 | 1.006                              | 0.985  | 0.846 | 0.676 | 0.576 | 0.814 | 0.577 |
| 27 | 0.839                              | 0.607  | 0.551 | 0.543 | 0.476 | 0.313 | 0.456 |
| 28 | 1.118                              | 0.759  | 0.716 | 0.575 | 0.795 | 0.523 | 0.036 |
| 29 | 0.257                              | 0.300  | 0.261 | 1.000 | 0.500 | 0.275 | 0.412 |
| 30 | 0.736                              | 0.550  | 0.395 | 0.979 | 0.090 | 0.570 | 0.549 |
| 31 | 0.490                              | 0.534  | 0.447 | 0.336 | 0.320 | 0.570 | 0.479 |
| 32 | 0.329                              | 0.681  | 0.173 | 0.778 | 0.017 | 0.419 | 0.363 |
| 33 | 0.038                              | 0.549  | 0.472 | 0.599 | 0.256 | 0.461 | 0.242 |

Supplemental table 1. continued

| ID | IgG Avidity level-after treatment |        |       |       |       |       |       |
|----|-----------------------------------|--------|-------|-------|-------|-------|-------|
|    | ESAT-6                            | CFP-10 | MDP1  | Ag85A | Acr   | HBHA  | HrpA  |
| 1  | 0.765                             | 0.549  | 0.487 | 0.623 | 0.526 | 0.750 | 0.588 |
| 2  | 0.760                             | 0.862  | 0.672 | 1.071 | 0.483 | 0.253 | 0.981 |
| 3  | 0.086                             | 0.151  | 0.197 | 0.106 | 0.099 | 0.780 | 1.473 |
| 4  | 0.727                             | 0.553  | 0.686 | 0.672 | 0.574 | 0.140 | 0.510 |
| 5  | 0.671                             | 0.458  | 0.615 | 0.601 | 0.581 | 0.590 | 0.657 |
| 6  | 0.818                             | 0.529  | 0.504 | 0.564 | 0.389 | 1.072 | 0.763 |
| 7  | 0.184                             | 0.698  | 0.499 | 0.728 | 0.463 | 0.755 | 0.780 |
| 8  | 1.494                             | 0.414  | 0.386 | 1.228 | 0.925 | 0.755 | 0.183 |
| 9  | 1.355                             | 0.745  | 0.477 | 0.635 | 0.715 | 0.348 | 0.707 |
| 10 | 1.239                             | 0.335  | 0.103 | 0.044 | 0.312 | 0.346 | 0.474 |
| 11 | 1.198                             | 0.575  | 0.364 | 0.354 | 0.304 | 0.651 | 0.514 |
| 12 | 1.305                             | 0.311  | 0.483 | 0.225 | 0.952 | 0.454 | 0.651 |
| 13 | 0.923                             | 0.895  | 0.577 | 1.012 | 0.478 | 0.744 | 0.594 |
| 14 | 0.231                             | 0.318  | 0.409 | 0.174 | 0.813 | 0.065 | 0.077 |
| 15 | 0.354                             | 0.646  | 0.481 | 0.550 | 0.381 | 0.664 | 0.565 |
| 16 | 0.684                             | 0.530  | 0.495 | 0.392 | 0.355 | 0.762 | 0.634 |
| 17 | 0.964                             | 0.543  | 0.682 | 0.344 | 0.729 | 0.571 | 0.573 |
| 18 | 0.063                             | 0.576  | 0.613 | 0.460 | 0.791 | 0.774 | 0.861 |
| 19 | 1.009                             | 0.526  | 0.574 | 0.053 | 0.159 | 0.748 | 0.601 |
| 20 | 0.733                             | 0.606  | 0.598 | 0.378 | 0.462 | 0.039 | 0.233 |
| 21 | 0.061                             | 0.742  | 0.737 | 0.979 | 1.000 | 0.595 | 0.339 |
| 22 | 1.115                             | 0.384  | 0.481 | 0.912 | 0.048 | 0.181 | 0.402 |
| 23 | 0.994                             | 0.868  | 0.597 | 1.030 | 0.617 | 0.813 | 0.809 |
| 24 | 0.453                             | 0.848  | 0.551 | 1.288 | 1.000 | 0.885 | 0.733 |
| 25 | 0.688                             | 0.639  | 0.494 | 0.740 | 0.558 | 0.626 | 0.503 |
| 26 | 0.757                             | 0.863  | 0.735 | 0.612 | 0.620 | 0.823 | 0.629 |
| 27 | 0.967                             | 0.665  | 0.669 | 0.586 | 0.646 | 0.530 | 0.561 |
| 28 | 0.591                             | 0.725  | 0.690 | 0.308 | 0.622 | 0.380 | 0.143 |
| 29 | 0.222                             | 0.311  | 0.397 | 0.261 | 0.111 | 0.178 | 0.490 |
| 30 | 1.315                             | 0.578  | 0.344 | 0.727 | 1.273 | 0.801 | 0.505 |
| 31 | 0.409                             | 0.550  | 0.418 | 0.195 | 0.279 | 0.891 | 0.323 |
| 32 | 0.331                             | 0.780  | 0.133 | 0.632 | 0.109 | 0.350 | 0.456 |
| 33 | 0.862                             | 0.585  | 0.434 | 0.581 | 0.348 | 0.450 | 0.315 |

Supplemental table 1. continued

| ID | IgA ELISA Index-before treatment |        |       |       |       |       |       |
|----|----------------------------------|--------|-------|-------|-------|-------|-------|
|    | ESAT-6                           | CFP-10 | MDP1  | Ag85A | Acr   | HBHA  | HrpA  |
| 1  | 1.217                            | 2.981  | 2.225 | 5.399 | 1.768 | 1.173 | 1.458 |
| 2  | 0.983                            | 1.158  | 0.861 | 1.004 | 0.838 | 0.952 | 1.092 |
| 3  | 0.336                            | 0.478  | 0.545 | 0.423 | 0.356 | 0.909 | 0.827 |
| 4  | 1.136                            | 1.222  | 1.230 | 0.733 | 0.509 | 0.725 | 0.993 |
| 5  | 0.654                            | 2.072  | 2.794 | 0.801 | 0.476 | 0.855 | 0.887 |
| 6  | 1.322                            | 1.198  | 1.908 | 0.858 | 0.733 | 1.179 | 1.177 |
| 7  | 1.764                            | 2.578  | 8.830 | 2.022 | 1.696 | 0.535 | 0.654 |
| 8  | 2.540                            | 3.657  | 3.767 | 2.977 | 1.948 | 1.104 | 0.729 |
| 9  | 1.196                            | 1.376  | 2.468 | 1.279 | 1.086 | 1.885 | 1.243 |
| 10 | 0.471                            | 1.195  | 0.869 | 0.784 | 0.359 | 1.252 | 0.947 |
| 11 | 1.176                            | 2.132  | 2.004 | 1.492 | 0.866 | 0.876 | 0.949 |
| 12 | 0.582                            | 2.104  | 3.089 | 1.166 | 0.894 | 0.854 | 0.698 |
| 13 | 1.723                            | 4.614  | 7.193 | 2.564 | 1.265 | 3.656 | 2.293 |
| 14 | 0.848                            | 2.546  | 4.432 | 1.930 | 0.932 | 1.160 | 1.259 |
| 15 | 2.249                            | 3.081  | 4.314 | 2.516 | 1.982 | 0.814 | 0.800 |
| 16 | 0.768                            | 0.957  | 1.004 | 0.905 | 0.741 | 0.901 | 0.836 |
| 17 | 1.491                            | 1.595  | 1.109 | 1.781 | 0.847 | 3.364 | 1.993 |
| 18 | 0.833                            | 0.823  | 1.486 | 1.095 | 0.532 | 0.939 | 0.809 |
| 19 | 1.069                            | 1.774  | 2.991 | 0.633 | 0.608 | 0.816 | 1.056 |
| 20 | 0.711                            | 0.973  | 1.011 | 0.790 | 0.702 | 2.575 | 1.827 |
| 21 | 1.668                            | 2.868  | 3.350 | 1.205 | 0.866 | 2.227 | 1.374 |
| 22 | 1.982                            | 3.223  | 2.993 | 2.936 | 1.620 | 1.246 | 1.113 |
| 23 | 2.154                            | 4.693  | 5.090 | 2.126 | 1.494 | 1.551 | 1.609 |
| 24 | 0.478                            | 1.473  | 0.919 | 0.662 | 0.625 | 1.740 | 1.026 |
| 25 | 1.470                            | 1.760  | 1.655 | 1.150 | 1.165 | 1.682 | 1.566 |
| 26 | 0.651                            | 3.965  | 1.262 | 0.857 | 0.753 | 2.443 | 1.974 |
| 27 | 1.816                            | 2.321  | 1.877 | 0.730 | 0.781 | 0.624 | 0.768 |
| 28 | 0.879                            | 1.475  | 1.214 | 1.028 | 0.759 | 0.901 | 0.990 |
| 29 | 1.156                            | 1.883  | 1.650 | 0.730 | 0.913 | 2.772 | 1.352 |
| 30 | 1.012                            | 1.924  | 1.184 | 1.295 | 1.149 | 0.999 | 0.722 |
| 31 | 1.165                            | 2.698  | 2.239 | 0.953 | 1.224 | 0.798 | 0.880 |
| 32 | 0.699                            | 1.446  | 0.859 | 0.843 | 0.653 | 1.360 | 0.700 |
| 33 | 0.732                            | 2.171  | 1.413 | 1.082 | 0.768 | 2.412 | 1.188 |

Supplemental table 1. continued

| ID | IgA ELISA Index-after treatment |        |       |       |       |       |       |
|----|---------------------------------|--------|-------|-------|-------|-------|-------|
|    | ESAT-6                          | CFP-10 | MDP1  | Ag85A | Acr   | HBHA  | HrpA  |
| 1  | 1.528                           | 3.207  | 3.314 | 5.771 | 1.570 | 1.234 | 1.586 |
| 2  | 0.419                           | 0.484  | 0.589 | 0.612 | 0.582 | 1.306 | 1.221 |
| 3  | 1.410                           | 1.287  | 1.586 | 1.401 | 0.671 | 1.193 | 1.158 |
| 4  | 0.418                           | 0.668  | 0.878 | 0.507 | 0.410 | 0.750 | 0.860 |
| 5  | 1.278                           | 3.161  | 4.046 | 1.260 | 0.836 | 1.886 | 1.143 |
| 6  | 0.398                           | 0.873  | 1.542 | 0.556 | 0.473 | 1.614 | 1.196 |
| 7  | 0.395                           | 0.544  | 2.681 | 0.369 | 0.325 | 0.396 | 0.542 |
| 8  | 2.142                           | 2.894  | 3.155 | 2.315 | 1.568 | 3.342 | 1.594 |
| 9  | 0.997                           | 1.427  | 2.640 | 1.852 | 1.136 | 1.115 | 0.868 |
| 10 | 1.727                           | 2.008  | 1.856 | 1.366 | 0.748 | 1.276 | 0.982 |
| 11 | 1.106                           | 5.419  | 1.435 | 2.240 | 0.602 | 1.041 | 0.626 |
| 12 | 1.689                           | 5.059  | 5.823 | 2.365 | 2.056 | 1.454 | 1.171 |
| 13 | 0.960                           | 1.654  | 2.928 | 1.321 | 0.757 | 2.576 | 1.618 |
| 14 | 1.330                           | 2.543  | 4.348 | 2.042 | 1.313 | 0.835 | 0.944 |
| 15 | 1.241                           | 3.119  | 4.691 | 2.015 | 1.602 | 1.090 | 0.825 |
| 16 | 0.594                           | 0.737  | 1.202 | 0.593 | 0.521 | 2.396 | 0.867 |
| 17 | 1.081                           | 1.752  | 1.385 | 2.021 | 0.960 | 2.332 | 1.398 |
| 18 | 0.834                           | 0.699  | 1.378 | 0.447 | 0.504 | 0.859 | 0.683 |
| 19 | 0.701                           | 1.766  | 2.957 | 0.666 | 0.619 | 1.248 | 1.389 |
| 20 | 1.619                           | 1.807  | 2.415 | 1.479 | 0.970 | 3.696 | 1.857 |
| 21 | 1.374                           | 1.502  | 2.053 | 1.000 | 0.640 | 1.522 | 0.927 |
| 22 | 1.679                           | 2.227  | 2.159 | 2.091 | 1.398 | 1.146 | 1.013 |
| 23 | 1.223                           | 3.874  | 4.079 | 1.956 | 1.300 | 1.747 | 1.652 |
| 24 | 0.727                           | 2.348  | 1.983 | 1.130 | 1.265 | 2.050 | 1.285 |
| 25 | 1.163                           | 2.265  | 2.045 | 1.063 | 1.220 | 1.319 | 1.352 |
| 26 | 1.722                           | 7.864  | 2.145 | 1.604 | 1.157 | 1.941 | 1.544 |
| 27 | 0.526                           | 1.383  | 1.359 | 0.515 | 0.559 | 0.754 | 0.744 |
| 28 | 1.231                           | 2.497  | 1.947 | 0.962 | 0.979 | 2.179 | 1.326 |
| 29 | 1.260                           | 2.130  | 1.520 | 0.728 | 0.883 | 2.026 | 1.299 |
| 30 | 1.012                           | 1.748  | 1.303 | 0.828 | 0.699 | 0.598 | 0.570 |
| 31 | 0.819                           | 2.184  | 2.123 | 1.003 | 1.024 | 0.711 | 0.754 |
| 32 | 0.730                           | 1.441  | 1.192 | 0.925 | 0.689 | 3.006 | 1.378 |
| 33 | 0.563                           | 1.181  | 0.951 | 0.857 | 0.641 | 1.003 | 0.673 |

Supplemental table 1. continued

| ID | IgA Avidity level-before treatment |        |       |       |       |       |       |
|----|------------------------------------|--------|-------|-------|-------|-------|-------|
|    | ESAT-6                             | CFP-10 | MDP1  | Ag85A | Acr   | HBHA  | HrpA  |
| 1  | 0.858                              | 1.119  | 0.913 | 1.236 | 1.203 | 1.022 | 0.888 |
| 2  | 0.784                              | 0.792  | 0.702 | 0.539 | 0.647 | 0.841 | 0.976 |
| 3  | 1.316                              | 0.924  | 0.944 | 1.063 | 1.113 | 0.738 | 0.775 |
| 4  | 0.715                              | 0.484  | 0.307 | 0.459 | 0.814 | 0.678 | 0.707 |
| 5  | 0.829                              | 0.549  | 0.394 | 0.580 | 0.767 | 1.523 | 1.093 |
| 6  | 0.848                              | 0.697  | 0.598 | 0.609 | 0.663 | 1.169 | 1.156 |
| 7  | 0.730                              | 0.588  | 0.204 | 0.624 | 0.639 | 0.633 | 0.940 |
| 8  | 0.569                              | 0.672  | 0.531 | 0.713 | 0.689 | 1.213 | 1.487 |
| 9  | 0.833                              | 0.742  | 0.735 | 0.803 | 0.826 | 0.864 | 1.039 |
| 10 | 0.814                              | 0.598  | 0.906 | 0.746 | 1.254 | 0.519 | 0.809 |
| 11 | 0.766                              | 0.577  | 0.540 | 0.543 | 0.774 | 0.636 | 0.677 |
| 12 | 1.113                              | 0.404  | 0.420 | 0.679 | 0.652 | 1.008 | 1.188 |
| 13 | 1.049                              | 0.409  | 0.395 | 0.629 | 0.846 | 0.362 | 0.757 |
| 14 | 0.668                              | 0.288  | 0.291 | 0.336 | 0.413 | 0.639 | 0.733 |
| 15 | 0.821                              | 0.668  | 0.483 | 0.712 | 0.553 | 0.882 | 1.187 |
| 16 | 1.316                              | 0.948  | 1.167 | 1.081 | 1.193 | 0.882 | 0.882 |
| 17 | 0.631                              | 0.695  | 0.814 | 0.898 | 1.019 | 1.692 | 0.765 |
| 18 | 1.069                              | 0.733  | 0.585 | 0.425 | 0.825 | 0.357 | 0.460 |
| 19 | 0.988                              | 0.735  | 0.547 | 0.813 | 0.753 | 0.983 | 0.779 |
| 20 | 1.100                              | 0.725  | 0.756 | 0.926 | 0.491 | 0.542 | 0.872 |
| 21 | 0.785                              | 0.388  | 0.459 | 0.515 | 0.582 | 0.680 | 0.710 |
| 22 | 0.835                              | 0.566  | 0.535 | 0.855 | 0.640 | 0.689 | 0.584 |
| 23 | 0.834                              | 0.604  | 0.578 | 1.017 | 0.818 | 1.033 | 0.850 |
| 24 | 0.575                              | 0.361  | 0.441 | 0.426 | 0.345 | 1.034 | 0.696 |
| 25 | 1.374                              | 1.126  | 1.119 | 0.587 | 0.606 | 1.557 | 0.680 |
| 26 | 0.624                              | 0.554  | 0.475 | 0.725 | 0.574 | 0.539 | 0.566 |
| 27 | 0.814                              | 0.676  | 1.006 | 1.037 | 0.950 | 0.503 | 0.395 |
| 28 | 1.030                              | 0.921  | 1.240 | 0.907 | 1.278 | 0.733 | 0.568 |
| 29 | 0.720                              | 0.697  | 0.631 | 1.568 | 0.741 | 0.776 | 0.790 |
| 30 | 1.143                              | 0.895  | 1.106 | 0.820 | 0.578 | 1.213 | 0.726 |
| 31 | 0.907                              | 0.402  | 0.442 | 0.505 | 0.472 | 0.705 | 0.540 |
| 32 | 1.095                              | 0.679  | 0.865 | 1.144 | 1.091 | 0.941 | 0.956 |
| 33 | 1.136                              | 0.585  | 0.610 | 0.667 | 0.666 | 0.794 | 0.874 |

Supplemental table 1. Antibody responses in individuals

| ID | IgG level-before treatment |        |       |        |        |       |       |
|----|----------------------------|--------|-------|--------|--------|-------|-------|
|    | ESAT-6                     | CFP-10 | MDP1  | Ag85A  | Acr    | HBHA  | HrpA  |
| 01 | 0.387                      | 0.854  | 1.286 | 1.137  | 0.379  | 0.615 | 0.220 |
| 02 | 0.109                      | 0.108  | 0.878 | 0.130  | 0.113  | 0.057 | 0.090 |
| 03 | 0.404                      | 0.572  | 1.534 | 0.931  | 0.319  | 0.495 | 0.162 |
| 04 | 0.120                      | 0.385  | 2.368 | 1.260  | 0.376  | 0.176 | 0.115 |
| 05 | 0.203                      | 0.592  | 2.456 | 0.310  | 0.349  | 0.044 | 0.080 |
| 06 | 0.032                      | 0.114  | 0.813 | 0.255  | 0.094  | 0.924 | 0.578 |
| 07 | 0.533                      | 1.359  | 1.522 | 1.309  | 0.499  | 1.249 | 0.924 |
| 08 | 0.095                      | 0.304  | 1.127 | 0.212  | 0.148  | 0.561 | 0.150 |
| 09 | 0.144                      | 0.177  | 1.701 | 0.125  | 0.140  | 0.458 | 0.273 |
| 10 | 0.095                      | 0.190  | 0.806 | 0.178  | 0.113  | 0.311 | 0.315 |
| 11 | 0.052                      | 0.305  | 1.441 | 0.302  | 0.437  | 0.465 | 0.578 |
| 12 | 0.029                      | 0.156  | 1.336 | 0.167  | 0.002  | 0.322 | 0.320 |
| 13 | 0.261                      | 0.654  | 2.119 | 1.030  | 0.418  | 1.481 | 0.635 |
| 14 | 0.175                      | 0.288  | 1.192 | 0.206  | 0.053  | 0.259 | 0.332 |
| 15 | 0.182                      | 0.624  | 1.416 | 0.465  | 0.251  | 1.069 | 0.962 |
| 16 | 0.101                      | 0.386  | 1.412 | 0.205  | 1.079  | 0.578 | 0.745 |
| 17 | 0.239                      | 0.350  | 2.205 | 2.133  | 0.408  | 0.342 | 0.123 |
| 18 | 0.010                      | 0.625  | 1.644 | 0.265  | 0.216  | 0.308 | 0.136 |
| 19 | 0.045                      | 0.616  | 1.105 | 0.260  | 0.123  | 0.635 | 0.234 |
| 20 | 0.023                      | 0.358  | 1.394 | 0.069  | 0.251  | 0.331 | 0.647 |
| 21 | 0.036                      | 1.775  | 0.985 | 0.225  | 0.208  | 0.291 | 0.238 |
| 22 | 0.039                      | 0.447  | 0.584 | 0.150  | 0.065  | 0.197 | 0.180 |
| 23 | 0.186                      | 1.571  | 1.350 | 0.943  | 0.633  | 1.271 | 1.150 |
| 24 | 0.045                      | 0.337  | 0.404 | 0.029  | 0.030  | 0.325 | 0.131 |
| 25 | 0.053                      | 0.481  | 0.851 | 0.087  | 0.071  | 0.471 | 0.193 |
| 26 | 1.243                      | 2.838  | 2.745 | 2.301  | 2.502  | 1.812 | 1.488 |
| 27 | 0.059                      | 0.819  | 1.539 | 0.188  | 0.157  | 0.253 | 0.370 |
| 28 | 0.068                      | 1.213  | 1.729 | 0.173  | 0.212  | 0.149 | 0.110 |
| 29 | 0.088                      | 0.162  | 0.150 | -0.004 | -0.001 | 0.449 | 0.568 |
| 30 | 0.127                      | 0.350  | 0.059 | 0.047  | 0.045  | 0.836 | 0.152 |
| 31 | 0.201                      | 0.701  | 1.479 | 0.252  | 0.243  | 0.512 | 0.409 |
| 32 | 0.043                      | 1.323  | 0.548 | 0.005  | 0.029  | 0.121 | 0.123 |
| 33 | 0.159                      | 1.179  | 1.398 | 0.302  | 0.178  | 0.134 | 0.199 |

Supplemental table 1. continued

| ID | IgG level-after treatment |        |       |       |        |       |       |
|----|---------------------------|--------|-------|-------|--------|-------|-------|
|    | ESAT-6                    | CFP-10 | MDP1  | Ag85A | Acr    | HBHA  | HrpA  |
| 01 | 0.240                     | 0.559  | 1.401 | 0.751 | 0.260  | 0.312 | 0.170 |
| 02 | 0.086                     | 0.094  | 0.630 | 0.127 | 0.131  | 0.044 | 0.080 |
| 03 | 0.754                     | 0.536  | 2.152 | 1.288 | 0.636  | 0.638 | 0.085 |
| 04 | 0.099                     | 0.335  | 2.109 | 1.344 | 0.376  | 0.222 | 0.126 |
| 5  | 0.116                     | 0.137  | 2.283 | 0.258 | 0.288  | 0.495 | 0.162 |
| 6  | 0.066                     | 0.131  | 0.955 | 0.184 | 0.129  | 0.552 | 0.464 |
| 7  | 0.410                     | 0.923  | 1.583 | 0.890 | 0.362  | 0.875 | 0.716 |
| 8  | 0.039                     | 0.243  | 0.931 | 0.127 | 0.093  | 0.546 | 0.134 |
| 9  | 0.144                     | 0.126  | 1.434 | 0.202 | 0.132  | 0.335 | 0.217 |
| 10 | -0.002                    | 0.099  | 1.320 | 0.088 | 0.038  | 0.466 | 0.124 |
| 11 | 0.081                     | 0.492  | 1.887 | 0.531 | 0.503  | 0.668 | 0.620 |
| 12 | 0.020                     | 0.253  | 0.948 | 0.298 | -0.009 | 0.207 | 0.461 |
| 13 | 0.234                     | 0.681  | 2.009 | 0.971 | 0.594  | 1.860 | 0.783 |
| 14 | 0.132                     | 0.235  | 0.841 | 0.199 | 0.016  | 0.107 | 0.229 |
| 15 | 0.170                     | 0.338  | 1.050 | 0.296 | 0.201  | 0.892 | 0.706 |
| 16 | 0.105                     | 0.257  | 1.749 | 0.199 | 0.121  | 0.714 | 0.773 |
| 17 | 0.166                     | 0.313  | 2.147 | 1.828 | 0.273  | 0.112 | 0.110 |
| 18 | 0.024                     | 0.684  | 1.710 | 0.246 | 0.206  | 0.350 | 0.148 |
| 19 | 0.058                     | 0.569  | 0.914 | 0.215 | 0.073  | 0.793 | 0.168 |
| 20 | 0.015                     | 0.419  | 1.360 | 0.078 | 0.210  | 0.090 | 0.437 |
| 21 | 0.017                     | 0.840  | 0.691 | 0.120 | 0.020  | 0.176 | 0.129 |
| 22 | 0.031                     | 0.571  | 0.559 | 0.126 | 0.084  | 0.196 | 0.204 |
| 23 | 0.178                     | 1.369  | 1.193 | 0.595 | 0.381  | 0.940 | 0.713 |
| 24 | 0.169                     | 0.326  | 0.537 | 0.030 | 0.009  | 0.750 | 0.148 |
| 25 | 0.069                     | 0.415  | 0.614 | 0.121 | 0.077  | 0.465 | 0.190 |
| 26 | 0.904                     | 2.783  | 2.336 | 1.469 | 1.251  | 1.711 | 1.216 |
| 27 | 0.075                     | 0.876  | 1.735 | 0.206 | 0.127  | 0.331 | 0.423 |
| 28 | 0.022                     | 1.460  | 1.867 | 0.158 | 0.166  | 0.133 | 0.021 |
| 29 | 0.108                     | 0.293  | 0.363 | 0.012 | 0.018  | 0.445 | 0.441 |
| 30 | 0.116                     | 0.419  | 0.627 | 0.211 | 0.064  | 0.814 | 0.204 |
| 31 | 0.146                     | 0.666  | 1.469 | 0.303 | 0.162  | 0.442 | 0.336 |
| 32 | 0.070                     | 1.419  | 1.733 | 0.044 | 0.083  | 0.173 | 0.102 |
| 33 | 0.029                     | 1.083  | 1.347 | 0.341 | 0.244  | 0.140 | 0.240 |

Supplemental table 1. continued

| ID | IgG Avidity level-before treatment |        |       |       |       |       |       |
|----|------------------------------------|--------|-------|-------|-------|-------|-------|
|    | ESAT-6                             | CFP-10 | MDP1  | Ag85A | Acr   | HBHA  | HrpA  |
| 1  | 0.877                              | 0.786  | 0.558 | 0.828 | 0.740 | 0.798 | 0.625 |
| 2  | 0.558                              | 0.623  | 0.379 | 0.664 | 0.341 | 0.219 | 0.335 |
| 3  | 0.711                              | 0.429  | 0.541 | 0.705 | 0.329 | 0.590 | 0.657 |
| 4  | 0.579                              | 0.488  | 0.797 | 0.824 | 0.758 | 0.327 | 0.734 |
| 5  | 0.686                              | 0.160  | 0.664 | 0.680 | 0.638 | 0.253 | 0.981 |
| 6  | 1.031                              | 0.461  | 0.558 | 0.580 | 0.553 | 0.863 | 0.876 |
| 7  | 0.455                              | 0.709  | 0.667 | 0.710 | 0.402 | 0.832 | 0.880 |
| 8  | 0.163                              | 0.877  | 0.391 | 0.686 | 0.568 | 0.766 | 0.455 |
| 9  | 0.632                              | 0.777  | 0.575 | 0.916 | 1.300 | 0.465 | 0.564 |
| 10 | 0.953                              | 0.433  | 0.429 | 0.265 | 0.447 | 0.559 | 0.633 |
| 11 | 0.728                              | 0.548  | 0.353 | 0.504 | 0.223 | 0.805 | 0.448 |
| 12 | 1.448                              | 0.455  | 0.508 | 0.977 | 1.121 | 0.620 | 0.631 |
| 13 | 0.289                              | 0.780  | 0.597 | 0.898 | 0.794 | 0.749 | 0.632 |
| 14 | 0.683                              | 0.439  | 0.557 | 0.331 | 0.676 | 0.294 | 0.246 |
| 15 | 1.505                              | 0.686  | 0.554 | 0.754 | 0.599 | 0.522 | 0.622 |
| 16 | 0.515                              | 0.187  | 0.398 | 0.408 | 0.035 | 0.600 | 0.616 |
| 17 | 0.467                              | 0.635  | 0.689 | 0.440 | 0.598 | 0.466 | 0.755 |
| 18 | 0.200                              | 0.748  | 0.760 | 0.637 | 0.620 | 0.839 | 0.900 |
| 19 | 0.511                              | 0.623  | 0.621 | 0.135 | 0.565 | 0.893 | 0.672 |
| 20 | 0.111                              | 0.916  | 0.685 | 0.783 | 0.637 | 0.805 | 0.349 |
| 21 | 0.319                              | 0.798  | 0.736 | 0.673 | 0.178 | 0.568 | 0.269 |
| 22 | 0.603                              | 0.682  | 0.618 | 0.490 | 0.395 | 0.160 | 0.348 |
| 23 | 0.796                              | 0.886  | 0.622 | 0.965 | 0.379 | 0.782 | 0.816 |
| 24 | 0.967                              | 0.698  | 0.529 | 1.379 | 1.267 | 1.057 | 0.706 |
| 25 | 0.566                              | 0.905  | 0.661 | 1.532 | 0.418 | 0.644 | 0.764 |
| 26 | 1.006                              | 0.985  | 0.846 | 0.676 | 0.576 | 0.814 | 0.577 |
| 27 | 0.839                              | 0.607  | 0.551 | 0.543 | 0.476 | 0.313 | 0.456 |
| 28 | 1.118                              | 0.759  | 0.716 | 0.575 | 0.795 | 0.523 | 0.036 |
| 29 | 0.257                              | 0.300  | 0.261 | 1.000 | 0.500 | 0.275 | 0.412 |
| 30 | 0.736                              | 0.550  | 0.395 | 0.979 | 0.090 | 0.570 | 0.549 |
| 31 | 0.490                              | 0.534  | 0.447 | 0.336 | 0.320 | 0.570 | 0.479 |
| 32 | 0.329                              | 0.681  | 0.173 | 0.778 | 0.017 | 0.419 | 0.363 |
| 33 | 0.038                              | 0.549  | 0.472 | 0.599 | 0.256 | 0.461 | 0.242 |

Supplemental table 1. continued

| ID | IgG Avidity level-after treatment |        |       |       |       |       |       |
|----|-----------------------------------|--------|-------|-------|-------|-------|-------|
|    | ESAT-6                            | CFP-10 | MDP1  | Ag85A | Acr   | HBHA  | HrpA  |
| 1  | 0.765                             | 0.549  | 0.487 | 0.623 | 0.526 | 0.750 | 0.588 |
| 2  | 0.760                             | 0.862  | 0.672 | 1.071 | 0.483 | 0.253 | 0.981 |
| 3  | 0.086                             | 0.151  | 0.197 | 0.106 | 0.099 | 0.780 | 1.473 |
| 4  | 0.727                             | 0.553  | 0.686 | 0.672 | 0.574 | 0.140 | 0.510 |
| 5  | 0.671                             | 0.458  | 0.615 | 0.601 | 0.581 | 0.590 | 0.657 |
| 6  | 0.818                             | 0.529  | 0.504 | 0.564 | 0.389 | 1.072 | 0.763 |
| 7  | 0.184                             | 0.698  | 0.499 | 0.728 | 0.463 | 0.755 | 0.780 |
| 8  | 1.494                             | 0.414  | 0.386 | 1.228 | 0.925 | 0.755 | 0.183 |
| 9  | 1.355                             | 0.745  | 0.477 | 0.635 | 0.715 | 0.348 | 0.707 |
| 10 | 1.239                             | 0.335  | 0.103 | 0.044 | 0.312 | 0.346 | 0.474 |
| 11 | 1.198                             | 0.575  | 0.364 | 0.354 | 0.304 | 0.651 | 0.514 |
| 12 | 1.305                             | 0.311  | 0.483 | 0.225 | 0.952 | 0.454 | 0.651 |
| 13 | 0.923                             | 0.895  | 0.577 | 1.012 | 0.478 | 0.744 | 0.594 |
| 14 | 0.231                             | 0.318  | 0.409 | 0.174 | 0.813 | 0.065 | 0.077 |
| 15 | 0.354                             | 0.646  | 0.481 | 0.550 | 0.381 | 0.664 | 0.565 |
| 16 | 0.684                             | 0.530  | 0.495 | 0.392 | 0.355 | 0.762 | 0.634 |
| 17 | 0.964                             | 0.543  | 0.682 | 0.344 | 0.729 | 0.571 | 0.573 |
| 18 | 0.063                             | 0.576  | 0.613 | 0.460 | 0.791 | 0.774 | 0.861 |
| 19 | 1.009                             | 0.526  | 0.574 | 0.053 | 0.159 | 0.748 | 0.601 |
| 20 | 0.733                             | 0.606  | 0.598 | 0.378 | 0.462 | 0.039 | 0.233 |
| 21 | 0.061                             | 0.742  | 0.737 | 0.979 | 1.000 | 0.595 | 0.339 |
| 22 | 1.115                             | 0.384  | 0.481 | 0.912 | 0.048 | 0.181 | 0.402 |
| 23 | 0.994                             | 0.868  | 0.597 | 1.030 | 0.617 | 0.813 | 0.809 |
| 24 | 0.453                             | 0.848  | 0.551 | 1.288 | 1.000 | 0.885 | 0.733 |
| 25 | 0.688                             | 0.639  | 0.494 | 0.740 | 0.558 | 0.626 | 0.503 |
| 26 | 0.757                             | 0.863  | 0.735 | 0.612 | 0.620 | 0.823 | 0.629 |
| 27 | 0.967                             | 0.665  | 0.669 | 0.586 | 0.646 | 0.530 | 0.561 |
| 28 | 0.591                             | 0.725  | 0.690 | 0.308 | 0.622 | 0.380 | 0.143 |
| 29 | 0.222                             | 0.311  | 0.397 | 0.261 | 0.111 | 0.178 | 0.490 |
| 30 | 1.315                             | 0.578  | 0.344 | 0.727 | 1.273 | 0.801 | 0.505 |
| 31 | 0.409                             | 0.550  | 0.418 | 0.195 | 0.279 | 0.891 | 0.323 |
| 32 | 0.331                             | 0.780  | 0.133 | 0.632 | 0.109 | 0.350 | 0.456 |
| 33 | 0.862                             | 0.585  | 0.434 | 0.581 | 0.348 | 0.450 | 0.315 |

Supplemental table 1. continued

| ID | IgA ELISA Index-before treatment |        |       |       |       |       |       |
|----|----------------------------------|--------|-------|-------|-------|-------|-------|
|    | ESAT-6                           | CFP-10 | MDP1  | Ag85A | Acr   | HBHA  | HrpA  |
| 1  | 1.217                            | 2.981  | 2.225 | 5.399 | 1.768 | 1.173 | 1.458 |
| 2  | 0.983                            | 1.158  | 0.861 | 1.004 | 0.838 | 0.952 | 1.092 |
| 3  | 0.336                            | 0.478  | 0.545 | 0.423 | 0.356 | 0.909 | 0.827 |
| 4  | 1.136                            | 1.222  | 1.230 | 0.733 | 0.509 | 0.725 | 0.993 |
| 5  | 0.654                            | 2.072  | 2.794 | 0.801 | 0.476 | 0.855 | 0.887 |
| 6  | 1.322                            | 1.198  | 1.908 | 0.858 | 0.733 | 1.179 | 1.177 |
| 7  | 1.764                            | 2.578  | 8.830 | 2.022 | 1.696 | 0.535 | 0.654 |
| 8  | 2.540                            | 3.657  | 3.767 | 2.977 | 1.948 | 1.104 | 0.729 |
| 9  | 1.196                            | 1.376  | 2.468 | 1.279 | 1.086 | 1.885 | 1.243 |
| 10 | 0.471                            | 1.195  | 0.869 | 0.784 | 0.359 | 1.252 | 0.947 |
| 11 | 1.176                            | 2.132  | 2.004 | 1.492 | 0.866 | 0.876 | 0.949 |
| 12 | 0.582                            | 2.104  | 3.089 | 1.166 | 0.894 | 0.854 | 0.698 |
| 13 | 1.723                            | 4.614  | 7.193 | 2.564 | 1.265 | 3.656 | 2.293 |
| 14 | 0.848                            | 2.546  | 4.432 | 1.930 | 0.932 | 1.160 | 1.259 |
| 15 | 2.249                            | 3.081  | 4.314 | 2.516 | 1.982 | 0.814 | 0.800 |
| 16 | 0.768                            | 0.957  | 1.004 | 0.905 | 0.741 | 0.901 | 0.836 |
| 17 | 1.491                            | 1.595  | 1.109 | 1.781 | 0.847 | 3.364 | 1.993 |
| 18 | 0.833                            | 0.823  | 1.486 | 1.095 | 0.532 | 0.939 | 0.809 |
| 19 | 1.069                            | 1.774  | 2.991 | 0.633 | 0.608 | 0.816 | 1.056 |
| 20 | 0.711                            | 0.973  | 1.011 | 0.790 | 0.702 | 2.575 | 1.827 |
| 21 | 1.668                            | 2.868  | 3.350 | 1.205 | 0.866 | 2.227 | 1.374 |
| 22 | 1.982                            | 3.223  | 2.993 | 2.936 | 1.620 | 1.246 | 1.113 |
| 23 | 2.154                            | 4.693  | 5.090 | 2.126 | 1.494 | 1.551 | 1.609 |
| 24 | 0.478                            | 1.473  | 0.919 | 0.662 | 0.625 | 1.740 | 1.026 |
| 25 | 1.470                            | 1.760  | 1.655 | 1.150 | 1.165 | 1.682 | 1.566 |
| 26 | 0.651                            | 3.965  | 1.262 | 0.857 | 0.753 | 2.443 | 1.974 |
| 27 | 1.816                            | 2.321  | 1.877 | 0.730 | 0.781 | 0.624 | 0.768 |
| 28 | 0.879                            | 1.475  | 1.214 | 1.028 | 0.759 | 0.901 | 0.990 |
| 29 | 1.156                            | 1.883  | 1.650 | 0.730 | 0.913 | 2.772 | 1.352 |
| 30 | 1.012                            | 1.924  | 1.184 | 1.295 | 1.149 | 0.999 | 0.722 |
| 31 | 1.165                            | 2.698  | 2.239 | 0.953 | 1.224 | 0.798 | 0.880 |
| 32 | 0.699                            | 1.446  | 0.859 | 0.843 | 0.653 | 1.360 | 0.700 |
| 33 | 0.732                            | 2.171  | 1.413 | 1.082 | 0.768 | 2.412 | 1.188 |

Supplemental table 1. continued

| ID | IgA ELISA Index-after treatment |        |       |       |       |       |       |
|----|---------------------------------|--------|-------|-------|-------|-------|-------|
|    | ESAT-6                          | CFP-10 | MDP1  | Ag85A | Acr   | HBHA  | HrpA  |
| 1  | 1.528                           | 3.207  | 3.314 | 5.771 | 1.570 | 1.234 | 1.586 |
| 2  | 0.419                           | 0.484  | 0.589 | 0.612 | 0.582 | 1.306 | 1.221 |
| 3  | 1.410                           | 1.287  | 1.586 | 1.401 | 0.671 | 1.193 | 1.158 |
| 4  | 0.418                           | 0.668  | 0.878 | 0.507 | 0.410 | 0.750 | 0.860 |
| 5  | 1.278                           | 3.161  | 4.046 | 1.260 | 0.836 | 1.886 | 1.143 |
| 6  | 0.398                           | 0.873  | 1.542 | 0.556 | 0.473 | 1.614 | 1.196 |
| 7  | 0.395                           | 0.544  | 2.681 | 0.369 | 0.325 | 0.396 | 0.542 |
| 8  | 2.142                           | 2.894  | 3.155 | 2.315 | 1.568 | 3.342 | 1.594 |
| 9  | 0.997                           | 1.427  | 2.640 | 1.852 | 1.136 | 1.115 | 0.868 |
| 10 | 1.727                           | 2.008  | 1.856 | 1.366 | 0.748 | 1.276 | 0.982 |
| 11 | 1.106                           | 5.419  | 1.435 | 2.240 | 0.602 | 1.041 | 0.626 |
| 12 | 1.689                           | 5.059  | 5.823 | 2.365 | 2.056 | 1.454 | 1.171 |
| 13 | 0.960                           | 1.654  | 2.928 | 1.321 | 0.757 | 2.576 | 1.618 |
| 14 | 1.330                           | 2.543  | 4.348 | 2.042 | 1.313 | 0.835 | 0.944 |
| 15 | 1.241                           | 3.119  | 4.691 | 2.015 | 1.602 | 1.090 | 0.825 |
| 16 | 0.594                           | 0.737  | 1.202 | 0.593 | 0.521 | 2.396 | 0.867 |
| 17 | 1.081                           | 1.752  | 1.385 | 2.021 | 0.960 | 2.332 | 1.398 |
| 18 | 0.834                           | 0.699  | 1.378 | 0.447 | 0.504 | 0.859 | 0.683 |
| 19 | 0.701                           | 1.766  | 2.957 | 0.666 | 0.619 | 1.248 | 1.389 |
| 20 | 1.619                           | 1.807  | 2.415 | 1.479 | 0.970 | 3.696 | 1.857 |
| 21 | 1.374                           | 1.502  | 2.053 | 1.000 | 0.640 | 1.522 | 0.927 |
| 22 | 1.679                           | 2.227  | 2.159 | 2.091 | 1.398 | 1.146 | 1.013 |
| 23 | 1.223                           | 3.874  | 4.079 | 1.956 | 1.300 | 1.747 | 1.652 |
| 24 | 0.727                           | 2.348  | 1.983 | 1.130 | 1.265 | 2.050 | 1.285 |
| 25 | 1.163                           | 2.265  | 2.045 | 1.063 | 1.220 | 1.319 | 1.352 |
| 26 | 1.722                           | 7.864  | 2.145 | 1.604 | 1.157 | 1.941 | 1.544 |
| 27 | 0.526                           | 1.383  | 1.359 | 0.515 | 0.559 | 0.754 | 0.744 |
| 28 | 1.231                           | 2.497  | 1.947 | 0.962 | 0.979 | 2.179 | 1.326 |
| 29 | 1.260                           | 2.130  | 1.520 | 0.728 | 0.883 | 2.026 | 1.299 |
| 30 | 1.012                           | 1.748  | 1.303 | 0.828 | 0.699 | 0.598 | 0.570 |
| 31 | 0.819                           | 2.184  | 2.123 | 1.003 | 1.024 | 0.711 | 0.754 |
| 32 | 0.730                           | 1.441  | 1.192 | 0.925 | 0.689 | 3.006 | 1.378 |
| 33 | 0.563                           | 1.181  | 0.951 | 0.857 | 0.641 | 1.003 | 0.673 |

Supplemental table 1. continued

| ID | IgA Avidity level-before treatment |        |       |       |       |       |       |
|----|------------------------------------|--------|-------|-------|-------|-------|-------|
|    | ESAT-6                             | CFP-10 | MDP1  | Ag85A | Acr   | HBHA  | HrpA  |
| 1  | 0.858                              | 1.119  | 0.913 | 1.236 | 1.203 | 1.022 | 0.888 |
| 2  | 0.784                              | 0.792  | 0.702 | 0.539 | 0.647 | 0.841 | 0.976 |
| 3  | 1.316                              | 0.924  | 0.944 | 1.063 | 1.113 | 0.738 | 0.775 |
| 4  | 0.715                              | 0.484  | 0.307 | 0.459 | 0.814 | 0.678 | 0.707 |
| 5  | 0.829                              | 0.549  | 0.394 | 0.580 | 0.767 | 1.523 | 1.093 |
| 6  | 0.848                              | 0.697  | 0.598 | 0.609 | 0.663 | 1.169 | 1.156 |
| 7  | 0.730                              | 0.588  | 0.204 | 0.624 | 0.639 | 0.633 | 0.940 |
| 8  | 0.569                              | 0.672  | 0.531 | 0.713 | 0.689 | 1.213 | 1.487 |
| 9  | 0.833                              | 0.742  | 0.735 | 0.803 | 0.826 | 0.864 | 1.039 |
| 10 | 0.814                              | 0.598  | 0.906 | 0.746 | 1.254 | 0.519 | 0.809 |
| 11 | 0.766                              | 0.577  | 0.540 | 0.543 | 0.774 | 0.636 | 0.677 |
| 12 | 1.113                              | 0.404  | 0.420 | 0.679 | 0.652 | 1.008 | 1.188 |
| 13 | 1.049                              | 0.409  | 0.395 | 0.629 | 0.846 | 0.362 | 0.757 |
| 14 | 0.668                              | 0.288  | 0.291 | 0.336 | 0.413 | 0.639 | 0.733 |
| 15 | 0.821                              | 0.668  | 0.483 | 0.712 | 0.553 | 0.882 | 1.187 |
| 16 | 1.316                              | 0.948  | 1.167 | 1.081 | 1.193 | 0.882 | 0.882 |
| 17 | 0.631                              | 0.695  | 0.814 | 0.898 | 1.019 | 1.692 | 0.765 |
| 18 | 1.069                              | 0.733  | 0.585 | 0.425 | 0.825 | 0.357 | 0.460 |
| 19 | 0.988                              | 0.735  | 0.547 | 0.813 | 0.753 | 0.983 | 0.779 |
| 20 | 1.100                              | 0.725  | 0.756 | 0.926 | 0.491 | 0.542 | 0.872 |
| 21 | 0.785                              | 0.388  | 0.459 | 0.515 | 0.582 | 0.680 | 0.710 |
| 22 | 0.835                              | 0.566  | 0.535 | 0.855 | 0.640 | 0.689 | 0.584 |
| 23 | 0.834                              | 0.604  | 0.578 | 1.017 | 0.818 | 1.033 | 0.850 |
| 24 | 0.575                              | 0.361  | 0.441 | 0.426 | 0.345 | 1.034 | 0.696 |
| 25 | 1.374                              | 1.126  | 1.119 | 0.587 | 0.606 | 1.557 | 0.680 |
| 26 | 0.624                              | 0.554  | 0.475 | 0.725 | 0.574 | 0.539 | 0.566 |
| 27 | 0.814                              | 0.676  | 1.006 | 1.037 | 0.950 | 0.503 | 0.395 |
| 28 | 1.030                              | 0.921  | 1.240 | 0.907 | 1.278 | 0.733 | 0.568 |
| 29 | 0.720                              | 0.697  | 0.631 | 1.568 | 0.741 | 0.776 | 0.790 |
| 30 | 1.143                              | 0.895  | 1.106 | 0.820 | 0.578 | 1.213 | 0.726 |
| 31 | 0.907                              | 0.402  | 0.442 | 0.505 | 0.472 | 0.705 | 0.540 |
| 32 | 1.095                              | 0.679  | 0.865 | 1.144 | 1.091 | 0.941 | 0.956 |
| 33 | 1.136                              | 0.585  | 0.610 | 0.667 | 0.666 | 0.794 | 0.874 |

Supplemental table 1. continued

| ID | IgA Avidity level-after treatment |        |       |       |       |       |       |
|----|-----------------------------------|--------|-------|-------|-------|-------|-------|
|    | ESAT-6                            | CFP-10 | MDP1  | Ag85A | Acr   | HBHA  | HrpA  |
| 1  | 0.781                             | 1.249  | 0.866 | 1.252 | 1.303 | 0.824 | 0.759 |
| 2  | 0.829                             | 1.317  | 0.811 | 0.674 | 0.818 | 0.845 | 0.809 |
| 3  | 0.502                             | 0.612  | 0.419 | 0.519 | 0.727 | 0.585 | 0.688 |
| 4  | 1.132                             | 0.609  | 0.365 | 0.710 | 0.773 | 0.794 | 0.722 |
| 5  | 0.864                             | 0.695  | 0.438 | 0.729 | 0.820 | 1.086 | 0.765 |
| 6  | 1.298                             | 1.017  | 0.963 | 1.176 | 1.278 | 1.206 | 0.800 |
| 7  | 0.639                             | 0.967  | 0.264 | 0.875 | 0.905 | 0.864 | 0.752 |
| 8  | 0.591                             | 0.568  | 0.491 | 1.138 | 0.645 | 0.322 | 0.599 |
| 9  | 0.993                             | 0.719  | 0.566 | 0.571 | 0.798 | 1.027 | 1.225 |
| 10 | 0.476                             | 0.451  | 0.517 | 0.531 | 0.660 | 0.645 | 0.975 |
| 11 | 0.695                             | 0.394  | 0.922 | 0.579 | 1.683 | 0.493 | 0.783 |
| 12 | 1.133                             | 0.308  | 0.405 | 0.654 | 0.600 | 0.737 | 0.868 |
| 13 | 0.596                             | 0.383  | 0.317 | 0.433 | 0.505 | 0.234 | 0.590 |
| 14 | 1.067                             | 0.763  | 0.676 | 0.832 | 0.887 | 1.079 | 1.191 |
| 15 | 1.158                             | 0.735  | 0.512 | 0.807 | 0.707 | 0.759 | 0.884 |
| 16 | 0.881                             | 1.098  | 0.598 | 1.077 | 1.223 | 0.690 | 0.941 |
| 17 | 1.007                             | 0.787  | 0.804 | 0.971 | 1.156 | 0.994 | 0.543 |
| 18 | 1.279                             | 0.855  | 0.521 | 0.935 | 0.906 | 0.639 | 0.695 |
| 19 | 1.402                             | 0.767  | 0.596 | 1.037 | 0.952 | 0.492 | 0.501 |
| 20 | 1.159                             | 0.874  | 0.775 | 0.994 | 0.882 | 0.515 | 0.938 |
| 21 | 0.456                             | 0.479  | 0.430 | 0.574 | 0.717 | 0.953 | 1.120 |
| 22 | 1.131                             | 0.755  | 0.758 | 0.920 | 0.831 | 1.382 | 1.308 |
| 23 | 1.221                             | 0.638  | 0.615 | 1.058 | 0.876 | 0.779 | 0.624 |
| 24 | 1.575                             | 0.588  | 0.593 | 0.455 | 0.404 | 1.359 | 0.832 |
| 25 | 0.771                             | 0.757  | 0.727 | 0.595 | 0.470 | 1.187 | 0.611 |
| 26 | 0.989                             | 1.225  | 0.832 | 1.214 | 1.014 | 0.787 | 0.739 |
| 27 | 1.352                             | 0.853  | 0.883 | 0.909 | 0.782 | 0.385 | 0.283 |
| 28 | 1.015                             | 0.563  | 0.719 | 0.895 | 0.862 | 0.648 | 0.544 |
| 29 | 0.577                             | 0.458  | 0.811 | 0.863 | 0.771 | 0.830 | 0.693 |
| 30 | 1.134                             | 0.963  | 0.923 | 1.301 | 1.038 | 1.234 | 1.051 |
| 31 | 0.234                             | 0.165  | 0.240 | 0.299 | 0.271 | 1.013 | 0.930 |
| 32 | 1.094                             | 0.819  | 0.635 | 0.807 | 0.888 | 0.576 | 0.659 |
| 33 | 1.460                             | 0.917  | 1.022 | 1.080 | 1.271 | 1.210 | 1.124 |
